# Supplementary material
Source: PubMed Central journal article supplement (PMC4149851)

| Genotype             |      | Bone Area<br>(mm <sup>2</sup> ) | P.Pm.<br>(mm) | BM Area<br>(mm <sup>2</sup> ) | E.Pm<br>(mm) | C.Th<br>(mm)             |
|----------------------|------|---------------------------------|---------------|-------------------------------|--------------|--------------------------|
| Cbl <sup>WT/WT</sup> | SHAM | 1.12 ± 0.16                     | 4.93 ± 0.09   | 0.52 ± 0.005                  | 4.01 ± 0.015 | 0.15 ± 0.005             |
|                      | OVX  | 1.21 ± 0.12                     | 4.18 ± 0.35   | 0.48 ± 0.02                   | 4.10 ± 0.06  | 0.15 ± 0.004             |
| Cbl <sup>YF/YF</sup> | SHAM | 1.50 ± 0.18 <sup>a</sup>        | 4.31 ± 0.41   | 0.65 ± 0.04                   | 3.79 ± 0.1   | 0.17 ± 0.01              |
|                      | OVX  | 1.31 ± 0.14                     | 4.16 ± 0.13   | 0.61 ± 0.02                   | 3.71 ± 0.19  | 0.16 ± 0.008             |
| Cbl <sup>-/-</sup>   | SHAM | 1.25 ± 0.06                     | 4.21 ± 0.44   | 0.49 ± 0.03                   | 3.92 ± 0.05  | 0.15 ± 0.05              |
|                      | OVX  | 1.28 ± 0.05                     | 4.17 ± 0.56   | 0.47 ± 0.003                  | 3.89 ± 0.06  | 0.14 ± 0.04              |
| Cbl-b <sup>-/-</sup> | SHAM | 0.86 ± 0.025 <sup>b</sup>       | 4.47 ± 0.35   | 0.79 ± 0.045                  | 3.56 ± 0.20  | 0.13 ± 0.005             |
|                      | OVX  | 0.76 ± 0.01                     | 4.24 ± 0.13   | 0.72 ± 0.02                   | 3.42 ± 0.10  | 0.11 ± 0.00 <sup>c</sup> |

**Supplementary Table 1. Cortical bone parameters of ovariectomized mice.** Bone parameters of the mid-shaft region of tibia of SHAM operated and ovariectomized mice (OVX) was determined by  $\mu$ CT analysis. Cortical bone area, periosteal perimeter (P.Pm), bone marrow (BM) area, endosteal perimeter (E.Pm) and cortical thickness (C.Th) as determined by  $\mu$ CT analysis are shown. Values shown are mean  $\pm$  SD from SHAM n=4, OVX n=6. \* p<0.05 was considered statistically significant as compared to respective controls using 2-way ANOVA with Bonferroni post-hoc test. <sup>a</sup>Cbl<sup>WT/WT</sup> SHAM vs Cbl<sup>YF/YF</sup> SHAM; <sup>b</sup>Cbl<sup>WT/WT</sup> SHAM vs Cbl-b<sup>-/-</sup> SHAM; <sup>c</sup>Cbl-b<sup>-/-</sup> SHAM vs OVX.

| Genotype                  | IL-1 $\beta$<br>(pg/ml) | IL-6<br>(pg/ml)     | TNF- $\alpha$<br>(pg/ml) | OPN<br>(ng/ml)   |
|---------------------------|-------------------------|---------------------|--------------------------|------------------|
| Cbl <sup>WT/WT</sup> SHAM | 3.1 $\pm$ 0.001         | 5.5 $\pm$ 0.002     | 1.65 $\pm$ 0.76          | 83.1 $\pm$ 12.75 |
| OVX                       | 30.5 $\pm$ 16.54*       | 5.5 $\pm$ 0.001     | 4.47 $\pm$ 1.03*         | 85.5 $\pm$ 10.11 |
| Cbl <sup>-/-</sup> SHAM   | 2.99 $\pm$ 0.69         | 43.96 $\pm$ 18.16   | 5.01 $\pm$ 2.84          | 63.1 $\pm$ 19.58 |
| OVX                       | 55.48 $\pm$ 16.96*      | 921.11 $\pm$ 118.2* | 23.11 $\pm$ 16.42        | 50.7 $\pm$ 3.837 |
| Cbl-b <sup>-/-</sup> SHAM | 3.1 $\pm$ 0.001         | 5.5 $\pm$ 0.004     | 2.47 $\pm$ 1.1           | 50.3 $\pm$ 1.77  |
| OVX                       | 4.38 $\pm$ 1.18*        | 10.35 $\pm$ 4.8*    | 10.42 $\pm$ 7.46         | 97.3 $\pm$ 37.98 |

**Supplementary Table 2. Ovariectomy resulted in increased serum levels of markers of inflammatory response in mice.** Cytokine levels of interleukin-1beta (IL-1beta), interleukin-6 (IL-6), tumor necrosis factor alpha (TNF- $\alpha$ ) and osteopontin (OPN) were measured in the serum of mice. Serum was collected from SHAM operated (n=6) and ovariectomized (OVX) mice (n=6) six weeks following surgery, and the cytokine levels were determined using ELISA. Serum levels of IL-1beta, IL-6, TNF- $\alpha$  and OPN are shown. Data are presented as mean  $\pm$  SD from indicated number of mice. \* p<0.05 as compared to respective controls using one way ANOVA and Tukeys multiple comparison test.

# Supplementary Figure. 1

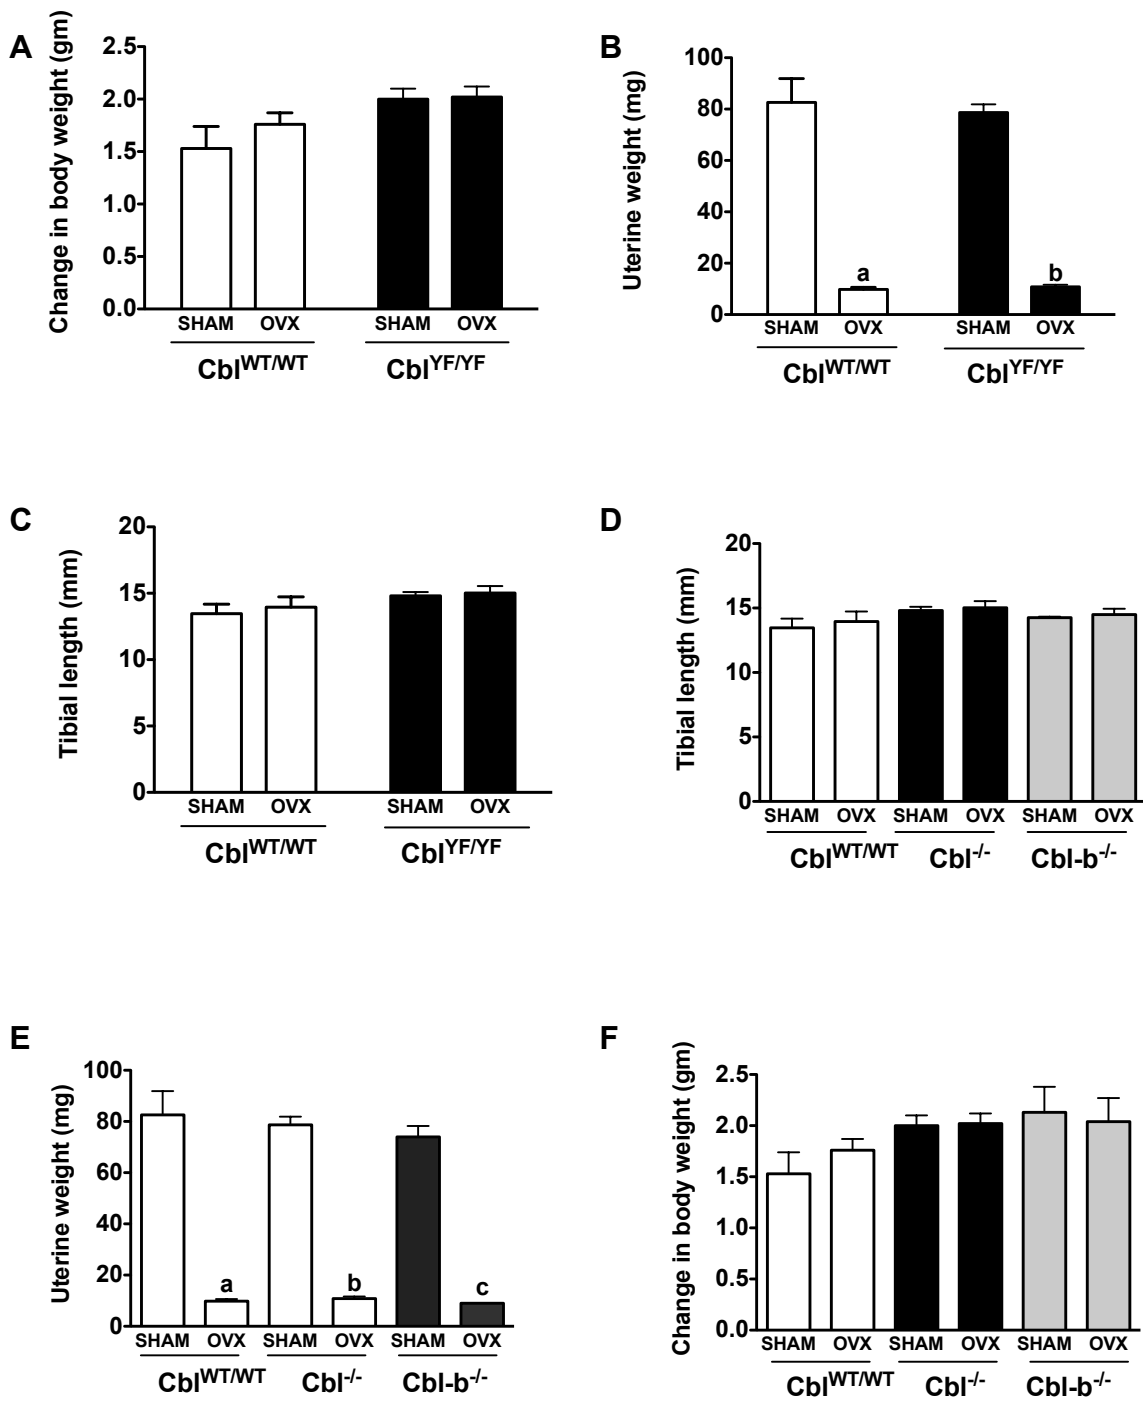

# Supplementary Figure 2

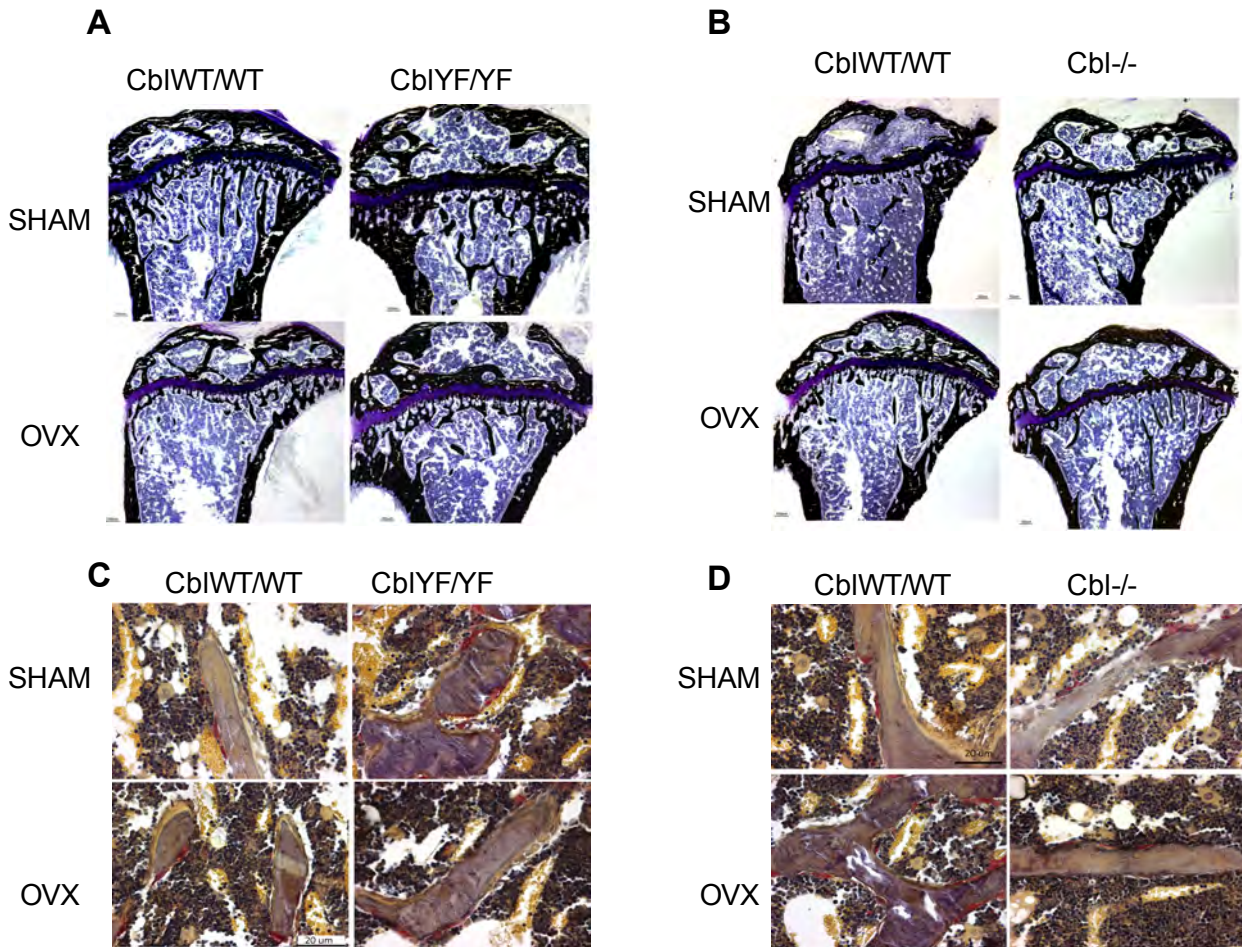

Supplementary Figure. 3

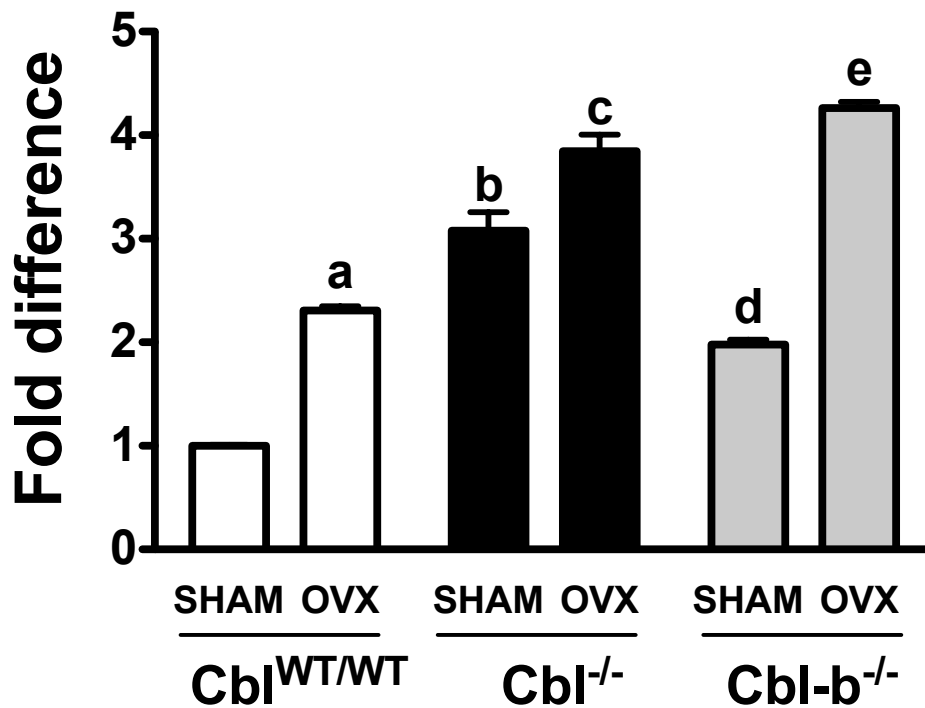

Supplement: NIHMS610922-supplement-01.pdf [file NIHMS610922-supplement-01.pdf]
